# Supplementary material for: Agreement and differences between the equations for estimating muscle and bone mass using the anthropometric method in recreational strength trainees
Source: PeerJ. 2024 Jun 7;12:e17506. doi: 10.7717/peerj.17506 (PMC11164060; doi:10.7717/peerj.17506)
Supplement: Supplemental Information 1 [file peerj-12-17506-s001.xlsx]

## Sheet: Database
Subject ID	SEX ( 1=male; 0=female)	Age	Body mass (kg)	Stretch stature (cm)	Biacromial breadth (cm)	Transverse chest breadth (cm)	Biiliocrestale breadth (cm)	Humerus breadth (cm)	Femur breadth (cm)	Bi-styloid breadth (cm)	Head girth (cm)	Arm relaxed girth (cm)	Arm flexed and tensed girth (cm)	Forearm girth (cm)	Chest girth (cm)	Thigh 1 cm gluteal girth (cm)	Thigh middle girth (cm)	Calf girth (cm)	Triceps skinfold (mm)	Subscapular skinfold (mm)	Thigh skinfold (mm)	Calf skinfold (mm)	% bone. Kerr.	Total bone Kg. Kerr.	%bone Rocha	Bone Kg Rocha	%muscle Kerr	Muscle Kg Kerr	%muscle Lee	Muscle Kg Lee	%muscle Poortmans	Muscle Kg Poormans	%muscle Matiegka	Muscle Kg Matiegka	Muscle/bone index (KERR/KERR)	Muscle/bone index (LEE / ROCHA)	Muscle/bone index (Portman/Rocha)	Muscle/bone index (matiegka/Rocha)	BMI
1	0	18.9534	52.1	152.4	35.05	25.4	25.1	5.7	8.45	4.7	53.1	26	26.05	23.1	78.1	55	50.45	35.9	17.5	7	23.25	18	10.8047	5.62925	14.6846	7.65068	37.3866	19.4784	38.9652	20.3009	34.2555	17.8471	50.8396	26.4874	3.46022	2.65347	2.33275	3.4621	22.432
2	0	19.0521	48	152.3	36.55	25.85	24.9	5.7	8.4	4.8	51	26.6	26.6	21.7	84	50	45.2	29.45	20	13	20.1	11	11.6888	5.61064	16.0964	7.72625	37.3183	17.9128	37.7657	18.1275	32.3486	15.5273	54.7618	26.2857	3.19265	2.34622	2.00969	3.40212	20.6939
3	1	19.126	63.5	172.5	41.05	27.9	30.05	6.65	10.1	5.6	54.55	27	29.05	24	88.35	52.15	49.95	35	7.2	8.5	6.9	4.1	14.3714	9.12584	18.4873	11.7395	43.2275	27.4494	46.0589	29.2474	43.2456	27.461	48.6816	30.9128	3.00788	2.49138	2.3392	2.63324	21.3401
4	1	19.3452	78.25	171.9	40.85	29.4	29.35	7.2	10.3	6	56.6	30.9	32.95	26.2	98.7	59.4	54.7	37.6	10.5	8	8.5	6.5	12.1981	9.54503	15.9003	12.442	44.0738	34.4878	41.7824	32.6948	40.5414	31.7236	40.3301	31.5583	3.61316	2.62777	2.54972	2.53643	26.4809
5	1	19.3945	71.7	176.7	43.35	29.5	27.2	7.2	10	5.75	58.45	29.65	31.95	26.4	96.05	53.7	52.9	37.2	5.75	8.75	5	3.5	13.4235	9.62463	17.1436	12.292	47.7961	34.2698	47.0201	33.7134	45.0722	32.3168	45.0927	32.3315	3.56064	2.74271	2.62909	2.63029	22.9639
6	1	19.5068	70.45	166	41.1	31.15	29	7	9.8	5.6	55	32	33.5	28	102.65	55.85	53	36.25	7.4	12	7.1	3.9	12.8137	9.02728	15.4415	10.8785	49.6753	34.9963	46.679	32.8854	44.4501	31.3151	43.4092	30.5818	3.87672	3.02296	2.87861	2.8112	25.5661
7	1	19.6685	81	170	41	31.4	28.5	7.05	9.5	5.5	57	34.5	35.85	27.95	105.4	61	57.5	38.55	11.2	12	14.5	6.1	11.0658	8.96326	13.4161	10.867	47.1739	38.2109	44.0132	35.6507	42.4065	34.3493	39.0139	31.6012	4.26305	3.28063	3.16088	2.90799	28.0277
8	1	20.1233	74.2	165.5	34.1	25.35	25.6	6.4	9.2	5.6	52	26.45	27	23.45	83.2	53.05	47.65	31.7	13.75	10	16.5	11.25	7.56261	5.61145	13.9561	10.3554	28.2298	20.9465	31.915	23.6809	29.6555	22.0044	38.9374	28.8916	3.73282	2.28681	2.12491	2.78999	27.0899
10	0	20.2575	65	165.05	38	28	25.4	6.6	8.8	5.6	54.25	30.1	30.5	24.4	88.7	55.25	50.4	35.9	20.5	14	20.5	19.5	10.2947	6.69158	15.3754	9.99401	36.7633	23.8962	35.3244	22.9609	32.4143	21.0693	44.8861	29.176	3.57108	2.29746	2.10819	2.91935	23.8607
11	0	20.2575	65	165.1	38	27.7	25.5	6.6	8.8	5.5	54.15	30.05	30.35	24.3	88.95	55.35	50.4	35.85	20.5	14.25	22	19	10.3095	6.70118	15.186	9.87087	36.6089	23.7958	35.2667	22.9234	32.0738	20.848	44.8847	29.1751	3.55098	2.32232	2.11207	2.95567	23.8462
12	0	20.3644	66.3	170.1	36.1	24.6	27.1	6.05	9	5.4	54	26.6	27.65	24.15	85.05	56.6	51.5	36	11.75	7.5	16.25	9	9.4279	6.2507	15.58	10.3296	37.9663	25.1717	37.6182	24.9409	34.7013	23.0069	45.5677	30.2114	4.02702	2.41451	2.22729	2.92475	22.9142
13	0	20.4219	53.1	160.7	37.6	23.8	28.85	6.3	8.4	5.2	54.2	26.05	26.95	24.05	80.4	54.55	46.3	34.95	14.75	6.5	29.25	13.75	13.5067	7.17208	16.6275	8.8292	36.6444	19.4582	39.3598	20.9	31.7105	16.8383	52.4215	27.8358	2.71304	2.36715	1.90711	3.1527	20.5619
14	0	20.5534	79.2	173.1	38.95	28.7	31.05	6.35	9.05	4.65	55.5	29.85	30.65	24.5	93.45	65.75	54.15	39.35	15.5	11.25	23.75	19.25	10.4122	8.24644	12.0682	9.55804	36.161	28.6395	33.6322	26.6367	31.1398	24.6627	39.318	31.1399	3.47296	2.78684	2.58031	3.25798	26.4321
15	0	20.6822	53.3	156	37	26.75	26.45	6	8.6	5.2	51.8	28.7	28.3	24	88.5	54.55	48.5	31.6	15.9	10.7	15.4	10	11.7454	6.26029	16.1478	8.60677	42.9894	22.9134	40.3712	21.5178	37.2133	19.8347	51.6856	27.5484	3.66011	2.50011	2.30454	3.20078	21.9017
16	1	20.726	76.2	179.9	42.4	28.8	28.05	6.7	9.35	5.9	58.15	30.75	32.6	27.1	98.25	59.1	51.45	32.6	7.5	11	9.75	9	11.5853	8.82799	16.0675	12.2434	42.3978	32.3072	40.3344	30.7348	40.0675	30.5314	42.819	32.6281	3.65963	2.51032	2.4937	2.66495	23.5447
17	1	20.7644	66.7	178	38.5	26.5	26.55	6.85	10	5.6	54.95	26.95	29	25.25	87.45	55.2	52.25	36.2	7.25	7	12.25	4.75	11.1694	7.45	18.2749	12.1894	42.8461	28.5784	45.5629	30.3905	43.2968	28.879	47.8934	31.9449	3.83602	2.49319	2.36919	2.62072	21.0516
18	0	20.8055	62.4	156.4	37.4	24.8	28.7	5.7	8.7	4.7	53.4	28.85	29.2	23.35	90	59.05	50.45	36.65	20.75	26.5	30.5	20	11.1069	6.93069	12.9883	8.10472	34.0132	21.2243	34.0754	21.2631	29.3967	18.3435	43.9072	27.3981	3.06236	2.62354	2.26332	3.38051	25.51
19	0	20.9233	61.8	168.7	37.65	26.65	29.4	6.45	8.95	5.1	53.7	27.9	29.05	24.55	86.2	55.85	50.25	34.5	14.25	8.75	22.25	15.75	11.9696	7.3972	15.7974	9.76278	38.022	23.4976	37.1478	22.9574	34.113	21.0818	48.1204	29.7384	3.17656	2.35152	2.15941	3.0461	21.7149
20	1	20.9562	67.5	177	40	27.2	26.8	7.1	9.9	5.6	55.25	27.8	29.8	25.5	91.7	54.1	53.05	36	7	7	10	7	11.9836	8.08896	17.7863	12.0058	45.352	30.6126	45.3671	30.6228	44.4089	29.976	47.4082	32.0005	3.78449	2.55067	2.4968	2.66543	21.5455
21	1	21.0274	75.6	180.8	40.5	27.25	30.25	6.95	9.5	5.7	54.95	29.9	31.3	26.6	94.35	61.65	53.45	38.85	12.25	9.75	25.5	15.25	11.5153	8.70556	16.0962	12.1688	40.4367	30.5701	40.8124	30.8542	37.519	28.3644	43.1298	32.6061	3.51157	2.53552	2.33092	2.67949	23.1273
22	0	21.1068	67.2	165.1	38.3	25.45	28.45	6.4	9.1	5.1	53	31.35	32.1	25.9	92.85	61.5	54.15	35.55	16.9	14.1	21.3	10.4	10.9729	7.37377	14.2562	9.58016	41.8464	28.1208	38.656	25.9768	36.4823	24.5161	44.1586	29.6746	3.81362	2.71152	2.55905	3.0975	24.6533
23	0	21.1068	54.3	157.05	36	24.15	26.35	6.05	8.45	5.1	54.75	26.35	26.75	23.3	85.95	55.3	49.3	33.1	21	16.5	22.75	15.75	11.6588	6.33072	15.5863	8.46338	36.9183	20.0466	35.5258	19.2905	32.3923	17.589	50.3442	27.3369	3.16656	2.27929	2.07825	3.23002	22.0153
24	1	21.2219	87.6	186.55	42.6	32	30.05	7.35	10.1	5.9	58.25	34.35	35.9	28.95	105.05	61.65	56.2	39.2	12	9.75	10	8.25	11.4754	10.0524	15.5491	13.621	47.4011	41.5233	43.159	37.8073	42.4278	37.1667	39.5884	34.6794	4.13067	2.77566	2.72863	2.54602	25.1718
25	1	21.3397	75.05	179.95	41.75	29.75	27.35	7	9.5	5.6	56.35	29.15	31.2	26.5	91.25	55.2	51.3	36.5	7	8.75	11.25	5	11.292	8.47462	15.9041	11.936	41.2398	30.9505	42.8985	32.1953	40.3182	30.2588	43.3134	32.5067	3.65214	2.69733	2.53509	2.72341	23.1765
26	1	21.4603	71	172.2	41.25	28.95	26.9	6.8	9.6	5.5	56.1	31.75	33.85	27.5	93.9	57.95	54.5	35.5	6.5	9	8.75	4	11.8094	8.38465	15.7051	11.1507	47.1133	33.4505	47.0989	33.4402	46.4674	32.9918	44.2816	31.4399	3.98949	2.99895	2.95874	2.81956	23.9437
27	1	21.4795	79.4	177.05	40.05	25.55	28.4	7.3	10.2	5.7	58.25	34.25	35.45	28.7	98.35	57.9	53.55	38.85	8.25	9	14	6.5	11.5658	9.18323	15.6476	12.4242	46.2121	36.6924	46.2386	36.7134	42.9765	34.1234	41.0219	32.5714	3.99559	2.95499	2.74652	2.62161	25.3296
28	1	21.5288	78.8	169.95	32.4	25.5	26.3	6.35	9.05	5.8	54.5	27.05	25.55	24.55	84.25	54.25	48	32.1	13	10.5	11	8	6.81098	5.36705	13.8299	10.898	29.2099	23.0174	32.1876	25.3639	30.7704	24.2471	37.9318	29.8903	4.28865	2.32739	2.22492	2.74274	27.2825
29	1	21.5479	91.3	182.3	40.5	30.15	30.4	7.2	10.5	5.85	57.7	34.05	35.05	27.35	102.1	64.25	59.9	41.6	20	23	20	7.5	10.6872	9.75739	14.7525	13.469	41.3918	37.7907	40.1051	36.616	38.8471	35.4674	36.8343	33.6297	3.87303	2.71853	2.63326	2.49682	27.4725
30	1	21.5973	82	174.05	40.05	29.3	30.75	7.1	10.05	5.5	58.1	32.95	32.75	27.85	96.75	66.1	60.05	40.2	11.75	15.25	12.5	12	11.7981	9.67443	14.2646	11.697	44.0948	36.1577	42.9998	35.2599	43.9525	36.0411	39.077	32.0431	3.73745	3.01444	3.08123	2.73944	27.0686
31	1	21.7425	66.2	169.3	38.15	26.95	26.15	6.95	9.2	5.6	54.95	29.1	32.35	26.6	91.2	55.55	50.4	35	7.5	7.5	8.75	5.5	10.9143	7.22527	16.1566	10.6957	44.5633	29.5009	45.0355	29.8135	42.8691	28.3793	46.102	30.5195	4.08302	2.78744	2.65335	2.85345	23.0964
32	1	21.7918	69.75	171.55	36.95	28.85	27.1	6.6	9.9	5.6	56.2	30.35	32.25	26.25	93.45	55.85	52.15	35.9	4.5	7.75	9.5	5.5	10.634	7.41725	16.4628	11.4828	45.6198	31.8198	46.3431	32.3243	44.4319	30.9912	44.7146	31.1884	4.28997	2.81502	2.69892	2.7161	23.7008
33	1	22.1068	80	171.1	41.25	28.1	26.95	7.55	10.4	5.7	56.35	32.55	33.6	29.5	95.25	59.8	54.95	38.95	9.5	10.5	7.5	5.75	11.5547	9.24373	14.9983	11.9986	44.2441	35.3953	43.5516	34.8413	42.2804	33.8243	39.2586	31.4069	3.82912	2.90377	2.81901	2.61754	27.3269
34	0	22.1397	62	164.1	37.7	26.4	27.25	6.55	8	5	54.35	25.7	27.35	23.45	75.1	57	50.55	35.15	13.75	6.5	15.25	10.25	10.8028	6.69772	13.7804	8.54388	33.3989	20.7073	36.6453	22.7201	34.382	21.3168	46.1587	28.6184	3.09169	2.65922	2.49498	3.34958	23.0237
36	0	22.3288	56.8	162.1	35.2	25.5	25.75	5.4	8.9	4.65	54.65	27.65	27.35	22.5	85.25	56.9	49	35.95	25	14.75	27.5	24.25	10.1483	5.76421	15.1443	8.60195	34.3268	19.4976	34.3595	19.5162	30.8166	17.5038	49.5505	28.1447	3.38254	2.26881	2.03487	3.27189	21.6163
37	0	22.5342	54.5	157	37.5	24.2	27	5.7	9	4.8	55.1	26.5	25.5	22.5	80.6	56.6	49.5	34.5	15.7	9	27.3	16.8	12.6996	6.92128	15.549	8.47421	35.7094	19.4616	37.3909	20.378	33.3275	18.1635	50.045	27.2745	2.81185	2.40471	2.14338	3.21853	22.1104
38	1	22.6493	63.5	160.5	37.95	29	26.95	6	9.2	5.1	54.5	29.5	29.8	25	94.8	56.1	51.45	34.5	10	16.7	13.1	10.9	11.1656	7.09016	14.6051	9.27421	43.0862	27.3597	43.1637	27.409	41.9045	26.6094	45.4366	28.8522	3.85883	2.9554	2.86918	3.11102	24.6504
39	1	22.7288	89.05	175.25	41.5	29	27	6.6	10.45	5.75	58.6	34.8	35.45	28.45	104.05	63.25	58.55	40.85	12.25	13.25	8.5	10.75	10.1609	9.04824	14.0768	12.5354	45.0169	40.0876	41.8507	37.268	42.2218	37.5985	36.6651	32.6503	4.43043	2.97303	2.9994	2.60465	28.9946
40	1	22.7781	74.5	173.35	42.6	30.2	27.7	6.7	9.5	5.4	54.65	33.6	35.7	28.45	100.7	58.15	53.35	36.75	7.1	12.3	6.6	4.2	11.5821	8.62869	14.803	11.0282	49.1608	36.6248	47.5243	35.4056	46.2074	34.4245	42.895	31.9568	4.24453	3.21046	3.1215	2.89773	24.7918
41	1	23.0247	73.5	173.5	40.65	27.35	25.8	7.3	9.8	5.6	56.5	34	36	29.5	100.1	58.55	53.25	36.05	7.3	10.4	8	6.1	11.3208	8.32077	15.762	11.5851	49.6587	36.4992	47.5057	34.9167	46.5014	34.1786	43.44	31.9284	4.38651	3.01394	2.95022	2.75599	24.4168
42	1	23.0411	70.6	183.25	43.35	30.4	27.3	6.4	9.5	5.95	57	27.4	30.5	25.95	94	52.9	58.05	36.4	5	7	9.25	4	12.0641	8.51725	18.115	12.7892	48.9783	34.5787	46.8476	33.0744	49.213	34.7444	47.4554	33.5035	4.05984	2.58612	2.7167	2.61967	21.0241
43	1	23.0411	77.5	168.6	40.8	28.9	27.5	6.9	9.85	4.95	57.55	34.55	38.15	29.55	100.5	59.15	56.95	29.95	10.5	6.5	10.25	8	11.427	8.85594	13.1918	10.2236	44.992	34.8688	40.2906	31.2252	43.4983	33.7111	39.915	30.9342	3.93734	3.05423	3.29738	3.02576	27.2638
44	1	23.0575	95.05	183.2	41.55	33.85	30.95	7.7	10.4	5.9	59.15	36.65	39.2	31.55	108.1	64.05	58.2	38.6	5	10.75	8	7	11.1617	10.6092	14.2594	13.5536	47.9206	45.5485	43.735	41.5701	44.1287	41.9443	36.2133	34.4207	4.29331	3.06709	3.09471	2.5396	28.3205
45	0	23.1589	59	163.8	36.6	26.8	27.6	5.8	8.15	5	56.05	25.95	25.7	21.85	83.75	58.85	52.6	36.15	10.5	18.5	21.5	19	10.9574	6.46487	14.6358	8.6351	36.5373	21.557	38.2215	22.5507	36.9209	21.7833	48.7297	28.7505	3.33449	2.61152	2.52265	3.32949	21.9899
46	1	23.1699	85.1	185.1	40.7	28.8	30.7	7.6	10.6	6.25	57.6	34.95	37.35	30.15	98.5	57.6	53.2	38.95	6	9	8.25	5	11.8635	10.0959	17.0693	14.526	46.6157	39.6699	46.676	39.7212	44.3155	37.7125	40.1817	34.1946	3.92932	2.7345	2.59622	2.35403	24.838
47	0	23.2932	51.9	158	34.5	27.55	28.1	6.1	8.35	5	56	24	25.1	22.5	86.1	51.5	47	33	9	8.5	9	6	12.5169	6.49625	16.0806	8.34582	43.1024	22.3702	41.2531	21.4103	38.2673	19.8607	53.6803	27.8601	3.44355	2.5654	2.37972	3.33821	20.7899
48	0	23.4137	56	159.1	36.4	25.75	27.75	6.3	9.55	5.1	52.55	26.15	25.85	22.7	82.45	54.8	47.2	35.2	16	10	24.25	9.5	12.4862	6.99227	16.7964	9.40599	36.3537	20.358	38.2735	21.4331	32.4658	18.1809	49.5545	27.7505	2.91151	2.27867	1.9329	2.9503	22.1232
49	1	23.4219	73.9	177.2	41.7	30.25	27.65	6.7	9.8	5.6	55.25	32.2	34.6	27.4	97.75	57.6	50.3	37.6	5	12	8	4	11.5076	8.5041	16.1549	11.9385	47.003	34.7352	47.8033	35.3266	44.4442	32.8443	43.8828	32.4294	4.08453	2.95906	2.75113	2.71638	23.5352
50	0	23.4274	64.7	167.2	36.4	27.35	28	6.6	9.1	5.7	55.55	28.9	29.55	24.75	87.35	59.05	54.3	37.45	11.25	6.5	21.25	12	11.0829	7.17065	16.3184	10.558	42.1933	27.2991	40.7739	26.3807	38.719	25.0512	46.3147	29.9656	3.80706	2.49864	2.37272	2.83818	23.1436
51	0	23.5753	67.9	170.4	38.85	24.95	26.8	6.2	9	5.2	56.45	28.25	29.15	24.3	86.45	60.95	50.05	36.55	15.25	8.25	23.75	8.5	10.6579	7.23673	14.8468	10.0809	36.51	24.7903	36.8051	24.9907	32.4478	22.032	44.4889	30.208	3.42562	2.479	2.18551	2.99654	23.3846
52	1	23.6932	70	175.35	41.25	29.4	26.25	7.1	9.8	5.55	57.35	29.95	31.45	26.35	90.7	54.5	52.05	36	6.5	7	12.5	6	12.2032	8.54226	16.695	11.6865	43.8693	30.7085	45.4244	31.7971	43.6837	30.5786	45.2796	31.6957	3.59489	2.72083	2.61657	2.71216	22.766
54	0	23.7397	58.1	161.85	37.7	27.5	25.15	6.5	8.6	5.6	54.3	26.15	26.7	22.2	89.4	56.15	54.1	33.1	18.5	14	21	12	11.2322	6.52589	16.4569	9.56143	39.9165	23.1915	36.1366	20.9954	36.6413	21.2886	49.2755	28.6291	3.55376	2.19584	2.2265	2.99423	22.1794
55	0	23.7397	58	161.95	37.75	28	25.3	6.5	8.6	5.6	54.3	26.05	33	22	89.55	56.2	54.1	33.1	18.5	14	21.5	12	11.3252	6.56861	16.4997	9.56985	39.8428	23.1088	36.0933	20.9341	36.518	21.1805	49.3837	28.6426	3.51807	2.18751	2.21325	2.993	22.1139
56	1	23.8384	77.2	178.45	41.6	29.35	29.5	7.25	10.6	6.2	56.9	31.1	34.4	28.05	95.05	60	55.4	38.2	6	7.75	8	7	12.822	9.89857	17.7589	13.7099	46.3919	35.8145	45.3103	34.9795	45.3253	34.9911	42.4032	32.7353	3.61815	2.55141	2.55226	2.38771	24.2429
57	1	23.8466	68.6	188.25	40.1	28.9	28.55	7	10.15	5.6	57	25.6	28.05	26.35	84.9	52.4	49.45	36.25	5	7	11.5	9.5	12.2683	8.41605	19.4485	13.3417	38.6144	26.4895	43.4543	29.8097	41.6051	28.5411	48.7826	33.4649	3.1475	2.23433	2.13925	2.5083	19.3577
58	0	24.0548	45.4	154.7	33.75	25.65	24.45	5.75	8.2	4.65	53.3	25.2	26	21.2	79.4	51.25	47.2	31.45	10	7	20.5	7	11.2532	5.10896	16.723	7.59224	41.7662	18.9619	44.8119	20.3446	40.3056	18.2987	59.1771	26.8664	3.71149	2.67966	2.41019	3.53867	18.9703
59	1	24.1726	65	165	35.15	26	25.95	6.5	9	5.7	54.4	26.5	27.1	24	84.05	52	48.3	32	10	8.5	9.5	7	9.56243	6.21558	15.8147	10.2796	35.7211	23.2187	38.7409	25.1816	37.9225	24.6496	44.7584	29.093	3.73557	2.44967	2.39793	2.83018	23.8751
60	1	24.2795	76.25	172.35	41.05	26.05	30.3	6.975	10.35	5.95	53	32.6	35.2	28.6	99.75	59.75	57.7	37.1	7.5	6	14	9.75	12.1907	9.29542	16.3372	12.4571	48.1059	36.6807	44.4301	33.8779	45.3974	34.6155	41.6947	31.7922	3.94611	2.71957	2.77878	2.55214	25.6695
62	1	24.411	82.1	174	40.35	29.1	28.45	7.1	9.75	6	56	34	37.45	29.1	100.5	58.1	54.55	35.9	6	8	7	6	10.6327	8.72945	14.8282	12.1739	45.6408	37.4711	43.1849	35.4548	43.4164	35.6449	39.1407	32.1345	4.29249	2.91235	2.92797	2.63962	27.1172
63	0	24.4603	53.95	155.55	34.9	24.85	27	5.55	8.6	4.7	55.35	27.05	27.35	22.1	81.9	53.15	47.1	32	12.5	18	22.25	9.5	11.4873	6.19739	14.7843	7.97615	35.272	19.0292	38.5376	20.7911	34.5167	18.6217	50.0148	26.983	3.07053	2.60665	2.33468	3.38296	22.2973
64	1	24.5781	85.4	183.1	43.5	28	28.6	7.6	11.2	5.8	57.5	32.75	34.85	29.65	101.35	62	54.25	38.05	16.25	12.25	20.25	6.5	12.5251	10.6965	16.5154	14.1041	42.5685	36.3535	39.3394	33.5958	37.3023	31.8562	39.2521	33.5213	3.39865	2.38199	2.25864	2.37671	25.4731
65	0	24.6384	49.2	158	34.9	23.4	27.3	5.75	8.55	4.5	54.75	22.65	23.65	20.65	75.6	52.35	49.3	34.2	16	7.5	24.25	16	12.5779	6.18831	16.0045	7.87424	34.2371	16.8447	37.8338	18.6142	35.1476	17.2926	55.139	27.1284	2.72201	2.36394	2.1961	3.44521	19.7084
66	1	24.7233	91.25	185.1	44	32.15	31.95	7.45	10.5	6	56.6	32.8	35.45	28	106.25	62.65	58.75	39.9	8.75	8.5	17.25	8.25	12.247	11.1754	15.3588	14.0149	45.7136	41.7137	41.0352	37.4446	40.9114	37.3317	37.7955	34.4884	3.73263	2.67177	2.66371	2.46083	26.633
67	1	24.7342	86.1	184.45	39.9	29.05	29.95	7.7	10.35	5.9	56.6	35.75	38	30	99.2	58	54	40.3	7	10.25	15	14.5	10.9698	9.44501	15.8404	13.6386	44.9592	38.7099	45.0597	38.7964	43.0727	37.0856	39.4765	33.9892	4.09845	2.84461	2.71917	2.49214	25.3073
68	0	24.8466	67.9	167	37.95	27.4	29.55	6.6	9.4	5.2	53	31.45	30.35	24.75	94.4	59.9	54.1	34.65	18.1	24.1	17.1	13.9	11.4195	7.75381	14.8804	10.1038	40.0085	27.1658	36.9631	25.0979	37.4957	25.4596	44.0577	29.9152	3.50354	2.48402	2.51981	2.96079	24.3465
69	1	24.9918	79.4	175.9	38.5	29.5	28.35	6.8	10.4	5.95	58	30.7	33.35	27.1	98.2	63.1	54.5	37.5	8.75	8.75	10	7.25	10.8217	8.59245	16.2067	12.8681	43.9444	34.8918	41.4753	32.9314	41.4035	32.8744	40.6037	32.2393	4.06076	2.55914	2.55471	2.50536	25.6619
70	0	25.1726	56.55	161.1	35.8	25.8	26.85	6.05	8.95	5.8	54.95	26.45	27.05	23.2	84	54.15	43.85	34.3	15	10	22	15	11.5606	6.53753	17.7176	10.0193	34.8085	19.6842	36.0904	20.4091	30.8486	17.4449	49.4638	27.9718	3.01095	2.03699	1.74113	2.79179	21.7892
71	1	25.3205	75.8	169.05	40.35	28.15	28.6	6.7	9.7	5.55	58.4	32.95	33.6	26.3	96.9	60.3	53.75	37.4	18.75	14.5	19.75	11.5	11.7972	8.94229	14.5283	11.0125	40.5212	30.7151	39.6667	30.0674	38.3233	29.0491	40.4182	30.637	3.43481	2.7303	2.63783	2.78202	26.524
72	0	25.3753	56.8	162.15	35.65	25.7	24.45	6.05	9	5.15	53.8	27.3	28.55	24	78.4	56.95	50.75	35.45	19.5	7	25.5	17.5	10.219	5.80439	16.4238	9.32874	35.5883	20.2141	36.9936	21.0123	34.7952	19.7637	49.636	28.1933	3.48256	2.25243	2.11858	3.0222	21.603
73	0	25.4192	55.95	162.9	34.75	25.5	27.05	5.9	8.3	4.7	56.05	26.6	25.8	22.8	75.5	59.7	49.15	34.2	16.5	8	22.5	15	10.8267	6.05755	14.8445	8.30551	33.3856	18.6792	37.3973	20.9238	35.0216	19.5946	50.3157	28.1517	3.08363	2.51927	2.35922	3.38951	21.0842
74	1	25.4247	88.1	179.5	43.9	33.95	29.9	7.3	9.75	5.55	58.45	37	37.9	29.2	109.25	63.5	55.9	38.85	12.75	14.75	8.25	6	11.7783	10.3767	13.6645	12.0384	48.2126	42.4753	44.0675	38.8234	43.73	38.5261	38.1146	33.5789	4.09335	3.22496	3.20027	2.78931	27.3431
75	1	25.6247	87.5	180.45	42.05	30.95	29.85	7.25	10.1	5.8	58.55	36.05	37.6	29.15	104.45	61.1	56.8	39.85	13	11.25	20.5	8	11.4307	10.0019	14.6675	12.834	45.7314	40.015	43.2105	37.8092	41.444	36.2635	38.266	33.4828	4.00075	2.94601	2.82557	2.6089	26.8716
76	0	25.7973	64.05	166.1	36.65	27.15	28.65	6.3	9.25	5.8	55.75	27.85	29.1	23.9	85.45	55.2	51.05	33.1	22	11.25	27.5	18	11.5099	7.37212	16.7269	10.7136	32.883	21.0616	31.4226	20.1262	30.6104	19.6059	45.2641	28.9917	2.85692	1.87857	1.83001	2.70607	23.2156
77	1	25.8356	82.5	175.05	40	31.9	29.65	7.4	10.3	6.05	57.2	35.5	37.25	29.1	110.2	60.15	55.4	37.1	8.25	16	12.5	6	11.552	9.53036	15.568	12.8436	49.0477	40.4644	44.5072	36.7185	44.0044	36.3036	39.5564	32.634	4.24584	2.85889	2.82659	2.54088	26.9234
78	1	25.9288	73.275	170.575	38.325	29.525	29.15	6.85	9.775	5.925	56.475	31.675	33.175	26.5	97.825	57.675	53.225	35.1	15.125	13.625	20	12	11.483	8.41417	16.0355	11.75	41.3741	30.3168	39.3667	28.8459	38.9475	28.5388	42.0828	30.8362	3.60307	2.45497	2.42883	2.62435	25.184
79	0	26.0055	63.5	163.55	35.55	28.8	26.55	5.9	8.9	5.15	54.95	27.4	28.5	24.3	85.45	59.7	50.8	37.65	17.25	12.25	25	14.25	9.83163	6.24309	14.754	9.36881	36.5123	23.1853	36.2558	23.0224	32.9864	20.9464	45.4035	28.8312	3.71376	2.45735	2.23576	3.07736	23.7396
80	1	26.1014	73.2	169.95	41.4	30	29.3	6.3	9.05	5.15	55.85	31.9	35.75	25.5	95	57.1	53	36.1	6	9	9	4	11.6386	8.51946	13.6798	10.0136	44.5793	32.6321	45.3583	33.2023	44.6635	32.6937	42.4115	31.0452	3.83029	3.31571	3.26492	3.10029	25.3436
81	1	26.1041	68.05	172.6	39.85	26.65	26.45	6.9	9.6	5.7	56.3	31.7	34.4	27.4	93.3	56.95	50.85	35.2	10.25	10	17.5	9.75	11.7155	7.9724	16.8637	11.4757	44.0331	29.9646	44.5966	30.348	42.7686	29.104	45.7005	31.0992	3.75854	2.64454	2.53614	2.71	22.8427
82	0	26.1342	53.2	162.1	36.15	24.65	25	6.15	8.35	5.15	51.45	24.45	23.6	21.3	81.4	52.25	47.2	31.8	9	7	18.5	12.5	10.3404	5.50107	16.6165	8.84	36.5296	19.4338	37.9351	20.1815	36.0512	19.1792	52.98	28.1853	3.53272	2.28297	2.1696	3.18839	20.2463
83	0	26.1836	59.55	161.35	34.05	26.55	26.8	5.7	8.7	4.9	55.65	30	29.75	23.5	81.6	57.8	51.1	34.35	14.5	14.5	21.25	14.75	9.9749	5.94005	14.6559	8.72758	36.8389	21.9376	39.296	23.4008	37.9066	22.5734	47.5584	28.321	3.69316	2.68124	2.58644	3.245	22.8741
84	0	26.2356	50.45	152.55	35.1	22.6	24.9	5.9	8.9	4.9	54	26.05	26.8	22.85	82.2	54.35	50.45	35	9.5	5.5	18.25	9.25	11.8348	5.97064	16.2322	8.18913	43.8823	22.1386	43.9895	22.1927	41.3881	20.8803	53.3523	26.9162	3.70791	2.71002	2.54976	3.28682	21.6789
85	1	26.2767	81	183.7	44	32.25	28.4	6.8	10.05	5.8	56.3	33.75	37.5	26.75	105.5	63.35	58	38	5	6.25	7	5	11.7017	9.47839	16.1951	13.118	52.3353	42.3916	47.9947	38.8757	49.7141	40.2684	42.4283	34.3669	4.47244	2.96354	3.0697	2.61983	24.0031
86	0	26.2932	60.7	167.05	36.4	26.6	27.45	6.1	8.8	5.25	55.2	25.5	28.5	24.2	83.15	56.65	50.15	35.5	15.5	8.25	22.5	12.5	10.8908	6.61069	15.9972	9.71029	36.4702	22.1374	36.0789	21.8999	33.8478	20.5456	48.2518	29.2888	3.34873	2.25533	2.11586	3.01627	21.7518
87	1	26.474	66.5	169.45	39.6	28.15	26.55	6.5	9.55	5.6	57.9	27.3	39.65	26.9	88.75	55.95	53.05	34.65	8.25	9	15.75	7.25	12.0306	8.00034	16.5379	10.9977	41.9483	27.8956	41.9658	27.9073	42.092	27.9912	45.6155	30.3343	3.4868	2.53756	2.54519	2.75824	23.16
88	1	26.7288	76	174	42.6	28.9	29.45	7.4	10.3	5.75	58	31.25	34.55	28.55	94.25	58.1	54.9	38.95	6.5	6	10.5	8	13.5269	10.2804	16.1594	12.2812	46.0415	34.9916	45.0336	34.2256	44.7188	33.9863	41.9434	31.8769	3.40371	2.78684	2.76735	2.5956	25.1024
89	0	27.3507	49.9	157.9	36.05	25.4	26.35	6.15	8.7	4.85	52.4	26.25	26.45	22.05	82.2	51.4	45.35	34.15	18.75	10	24.5	10.75	12.382	6.1786	16.8366	8.40148	37.912	18.9181	39.9215	19.9208	34.6996	17.3151	54.8381	27.3642	3.06187	2.37111	2.06096	3.25707	20.0141
90	0	27.9178	59.6	155	35.3	25.7	25.2	6.15	8.4	4.6	53.05	26.1	26.5	22.3	81.85	52.2	47.45	26.1	16.75	9	26	18.25	9.72749	5.79759	12.8953	7.68558	27.9756	16.6734	27.5292	16.4074	28.0575	16.7222	44.4996	26.5217	2.87593	2.13483	2.1758	3.45085	24.8075
92	0	27.9562	65.65	166.85	37.7	27.6	29.4	6.3	9.4	5.2	53.1	29.6	29.4	23.2	86.1	60.85	52.7	35.2	10.5	8.5	18	9.25	11.4662	7.52759	15.3707	10.0908	39.4447	25.8955	39.5564	25.9688	39.0191	25.616	45.3755	29.789	3.44008	2.5735	2.53854	2.95208	23.5821
93	1	28.0082	77.8	174.25	39.95	31.9	29.7	7.1	9.95	5.9	58.4	30	31.85	26	90.25	57.15	51.1	37	11.25	11.5	19.5	6	12.0213	9.35261	15.7189	12.2293	36.8369	28.6591	39.2199	30.5131	36.8658	28.6816	40.2035	31.2784	3.06429	2.49509	2.34532	2.55766	25.6232
95	0	28.1205	46.75	160.95	32.65	23.5	26.4	6	8.7	4.8	53.1	25.1	25.6	22.25	76.35	46.8	40	30.15	8.5	6.5	15.5	7	11.4779	5.36594	18.3316	8.57004	35.8153	16.7437	42.2841	19.7678	36.8966	17.2491	58.9373	27.5532	3.12036	2.30662	2.01272	3.21506	18.0468
96	0	28.1233	74	173	39.55	29.45	30.85	6	9.35	5.1	55.5	27.5	27.2	24.4	95.6	59.9	51.85	39	21	19.6	17.9	13	11.253	8.3272	14.1068	10.439	37.1266	27.4737	33.2811	24.628	31.9673	23.6558	41.872	30.9853	3.29927	2.35923	2.2661	2.96822	24.7252
97	0	28.3397	55.5	163.55	35	23.35	25.925	6.125	8.55	4.95	52.475	27.95	28.4	22.9	85.05	54.225	50.3	32.125	9.25	5.5	12.5	7.75	10.0952	5.60283	15.9492	8.85178	43.5488	24.1696	42.3866	23.5246	42.9486	23.8365	52.2864	29.019	4.31382	2.65761	2.69284	3.27832	20.7487
98	0	28.537	64.75	162.95	35.55	26.95	28.15	5.7	9.8	5.1	54.45	25.6	26.65	22.2	85.1	62.25	53.65	36.55	17.5	10	25.25	15.25	10.6454	6.89289	15.3088	9.91247	34.7274	22.486	33.3198	21.5746	33.1416	21.4592	44.3534	28.7189	3.2622	2.17651	2.16487	2.89724	24.3855
99	1	28.5945	79.7	178.1	42.9	29.25	28.55	7.3	10.95	6.4	58.6	34.1	37.8	29.6	99.45	57.1	54.55	37	5	9	8.75	5	13.0928	10.435	17.9566	14.3114	48.0536	38.2987	46.3149	36.913	46.6203	37.1564	41.2653	32.8884	3.67022	2.57927	2.59628	2.29806	25.1264
100	0	28.8877	57.4	166.75	34.1	27.2	26.75	6.2	9.15	5.55	54.65	25.6	26.5	23.8	83.7	56.3	47.7	35.85	10.5	5.75	12.25	7.5	10.5331	6.04601	18.049	10.3601	41.3893	23.7574	41.2107	23.655	38.856	22.3033	51.3418	29.4702	3.92944	2.28328	2.15281	2.84459	20.6434
101	0	29.4849	46.8	150.1	34.1	25.8	26.1	5.6	8.1	4.6	51.2	24.25	23.8	21.3	79.7	50.65	44.5	31.4	6.5	7	12	6	11.2669	5.27289	15.2869	7.15426	40.4411	18.9264	42.4148	19.8501	39.9089	18.6774	55.756	26.0938	3.58938	2.77459	2.61066	3.64731	20.7723
102	0	29.537	49.5	159.45	35.25	24.65	27.55	6.35	9.1	4.7	53.45	23.05	24.7	21.9	78.75	50.6	45.7	33.2	10.25	6.5	17.75	11	13.3836	6.62488	17.3771	8.60166	37.3943	18.5102	39.4488	19.5272	37.0914	18.3602	55.7039	27.5734	2.79404	2.27016	2.1345	3.20559	19.4696
103	1	29.7397	55.45	166.1	37.05	22.95	28.9	6.65	8.8	4.75	51.7	24.2	25.4	22.2	81.9	54.2	47.85	33.65	11.75	5	20.75	11.5	12.5765	6.97365	16.1754	8.96928	36.7706	20.3893	41.6159	23.076	40.403	22.4035	52.2462	28.9705	2.92376	2.57279	2.4978	3.22997	20.0984
105	0	30.5096	57.2	158	36	26.95	28.85	6.4	9.5	5	54.5	27.5	28	24	89.2	54	50.05	35.2	16.6	12.6	17.9	12	12.9804	7.4248	15.9945	9.14886	41.5184	23.7485	38.1133	21.8008	37.5725	21.4914	48.9412	27.9944	3.19854	2.3829	2.34908	3.05988	22.913
106	0	30.9041	61.9	168.9	37.35	24.45	27.7	6.25	9.275	4.925	56.8	26.9	28.35	23.45	87.75	57.95	52.5	34.9	14.25	6	21.75	18.25	11.867	7.34569	15.807	9.78451	39.1626	24.2417	35.6558	22.0709	37.2615	23.0649	48.3279	29.915	3.30012	2.2557	2.35728	3.05738	21.6986
107	0	31.0247	46.7	151.85	34.85	23.75	23.95	5.5	7.95	4.5	52.7	23.1	23.6	20.1	73.15	55.4	49.2	32.4	10.5	6.5	28.75	13.75	10.7944	5.041	15.13	7.06573	34.1948	15.969	38.9226	18.1769	37.8287	17.666	55.6069	25.9684	3.16782	2.57254	2.50024	3.67527	20.2529
108	1	31.0411	66.1	175.75	38.6	29.35	26.05	6.9	10	5.8	55.7	27.4	29.35	25.4	88.7	53.8	50.1	36.8	8.75	8.5	11.75	7.75	11.4358	7.55907	18.5679	12.2734	42.304	27.963	44.0849	29.1401	43.6351	28.8428	47.6194	31.4765	3.69926	2.37425	2.35003	2.5646	21.3999
109	1	31.3644	69.4	179.85	41.05	30.35	27.9	6.9	9.6	6.15	58.25	32.75	34.8	28.05	100.1	56.9	52.95	36.35	6.5	7.25	11	4	12.4984	8.67389	18.5081	12.8447	53.1016	36.8525	50.3707	34.9573	50.577	35.1004	47.6738	33.0856	4.24867	2.72154	2.73269	2.57583	21.4555
111	1	31.5534	67.4	170.15	38.45	28.05	27.25	6.9	9.7	5.85	55.95	29.05	32.05	23.85	92.9	55.1	50.95	36.15	7.5	9	6	4	11.7205	7.89961	17.1204	11.5392	44.5958	30.0576	45.1728	30.4465	45.7358	30.8259	45.7505	30.8359	3.80494	2.63853	2.67142	2.67228	23.2807
112	1	31.6411	79.15	179.3	41.55	33.2	28.2	7.4	10.1	5.6	59.3	32.85	36.1	28.6	102.65	57	53.15	38.4	4.5	8.5	6	2	12.1387	9.60777	15.6714	12.4039	50.0068	39.5804	47.1157	37.2921	46.8977	37.1196	42.0274	33.2647	4.11963	3.00648	2.99257	2.68179	24.6201
115	1	32.5342	72.5	168.05	39.8	27.3	27.45	6.65	9.5	5.75	55	34.35	36.7	27.4	101.65	60.2	54.55	36.3	6.5	8	9.5	4.5	11.0265	7.99421	15.2189	11.0337	50.0614	36.2945	47.7804	34.6408	49.073	35.5779	42.8782	31.0867	4.5401	3.13955	3.22448	2.81744	25.6721
116	0	32.7479	64	166.15	37.8	27.1	25.45	6.2	8.95	5.65	56.35	28.1	29.35	23.95	89.2	57.85	51.5	36.25	8	7	14.5	17.75	10.5669	6.7628	16.0562	10.276	41.2787	26.4184	38.1831	24.4372	39.8085	25.4774	46.4195	29.7085	3.90643	2.37809	2.47932	2.89106	23.1835
117	1	32.8493	77.9	175.1	37.15	27.15	27.35	6.9	10.3	5.25	55.15	33.1	33.8	29.05	94.15	60.75	57.15	37.25	10.25	9.5	6	7	9.80268	7.63629	14.9097	11.6147	46.0999	35.9118	44.2199	34.4473	47.9755	37.3729	41.2647	32.1452	4.70279	2.96584	3.21774	2.76764	25.4077
118	0	33.1288	64.55	171.15	35.5	30.15	29.3	6.2	8.6	4.6	55.8	27.25	26.85	22.8	84.5	58.5	48.6	34.4	11.5	16	13.5	13	10.3915	6.70773	13.9429	9.00013	34.6911	22.3931	35.9793	23.2246	36.8112	23.7616	46.6153	30.0902	3.33841	2.58048	2.64014	3.34331	22.0365
119	0	33.189	52.15	155.65	35.1	25.7	26.15	5.6	8.6	4.9	54.7	25.8	24.85	23.9	80.5	51.75	46.3	33.05	10.5	8	19.5	11	11.5016	5.99807	15.7697	8.22388	38.327	19.9875	38.912	20.2926	37.6623	19.6409	51.9092	27.0707	3.33232	2.46752	2.38828	3.29172	21.5256
120	0	33.411	61.8	161.3	35.8	25.05	27	6.1	8.75	5.35	55.05	29.05	29.45	22.1	81.05	62.85	58.95	37	18	13.25	25.5	16.5	10.5349	6.51057	15.0888	9.32487	37.8249	23.3758	38.2661	23.6485	42.1303	26.0365	46.2227	28.5656	3.59044	2.53607	2.79216	3.06338	23.7531
121	0	33.8795	67.8	159	36.5	28.75	29.7	6.25	9.5	4.9	54.15	28.3	27.45	24	98.35	56.65	54	35.45	20.25	30.25	20.75	16	11.2091	7.59976	13.4212	9.09959	37.3433	25.3187	31.7283	21.5118	34.1938	23.1834	41.8484	28.3732	3.33152	2.36404	2.54774	3.11807	26.8186
122	1	34.0027	75	167	40.5	28.15	27.5	6.9	10.15	5.75	56.05	30.3	32.1	26.3	93.7	55.05	53.25	37.65	8.25	13.25	9	8	11.686	8.76452	15.2844	11.4633	41.464	31.098	41.2476	30.9357	42.7592	32.0694	40.4575	30.3431	3.54817	2.69867	2.79758	2.64698	26.8923
123	1	34.0356	82	170.35	38.2	28	31.7	7.35	10.2	5.8	57.5	36.55	38	31.45	107.9	63.3	57.95	40.55	18.25	19	21.5	18.25	11.7371	9.6244	14.5203	11.9066	46.7128	38.3045	41.0219	33.638	42.5944	34.9274	38.4675	31.5434	3.97994	2.82514	2.93344	2.64923	28.2572
124	0	34.1068	67.4	172.5	36.5	29.9	27.65	6.6	8.8	5.4	53.9	28.6	29.4	24.3	88.8	57.9	49.75	35.4	10.25	8.5	16.25	10.5	9.72095	6.55192	15.3864	10.3704	39.0878	26.3452	37.5291	25.2946	37.7129	25.4185	45.6447	30.7645	4.02099	2.4391	2.45105	2.96656	22.6507
125	1	34.3562	66.3	171.7	37.55	27.7	25.75	6.6	9.7	4.7	57.65	30.6	30.45	24.5	92	54.7	51.1	35.8	14.75	14.5	25.75	14.5	11.0086	7.29873	15.0865	10.0023	39.479	26.1746	41.2535	27.3511	41.2065	27.3199	46.1506	30.5978	3.58618	2.73447	2.73135	3.05907	22.4891
128	1	35.2329	70.2	170	40.05	27.95	27.8	7.1	9.95	5.7	56.65	30.3	31.2	26.15	94.45	56.1	53.85	38.05	10	11.25	11	9.75	12.4736	8.75644	16.4108	11.5204	45.0839	31.6489	43.8945	30.8139	46.0303	32.3133	44.0355	30.9129	3.61436	2.67474	2.80488	2.68333	24.2907
129	1	35.2493	88.1	184	43.15	29.5	30.75	7.1	10.5	5.75	55.3	31.55	33.15	27.9	99.2	59.85	57.05	40.3	14.75	17	19.75	14	11.6057	10.2246	15.3027	13.4817	39.9873	35.2288	37.5379	33.0709	39.3471	34.6648	38.1665	33.6247	3.4455	2.45302	2.57125	2.4941	26.022
131	1	35.2932	65.1	170.8	38.45	27.6	27.35	6.75	9.8	5.5	56.55	26.65	27.75	24.75	91	55.1	51.9	34.9	8.75	13	10.75	11.5	12.2213	7.95608	17.1809	11.1848	41.7199	27.1597	40.9791	26.6774	44.5175	28.9809	46.9383	30.5568	3.4137	2.38515	2.5911	2.732	22.3154
132	1	35.4575	70.2	170	40.05	27.95	27.8	7.1	9.95	5.7	56.65	30.3	31.2	26.15	94.45	56.1	53.85	38.05	10	11.25	11	9.75	12.4736	8.75644	16.4108	11.5204	45.0839	31.6489	43.8791	30.8031	46.0738	32.3438	44.0355	30.9129	3.61436	2.6738	2.80754	2.68333	24.2907
134	1	35.6247	66.95	162.45	39.4	27.1	27.4	7.15	9.8	5.9	54.95	31.85	34.05	26.95	96.6	53.4	48.2	34.85	6	11	7	2.5	12.4607	8.34245	16.3526	10.9481	45.9206	30.7438	45.826	30.6805	45.6581	30.5681	44.1073	29.5298	3.68522	2.80237	2.7921	2.69726	25.3695
137	1	37.537	79.8	170.35	38.7	26.7	29.45	7	9.425	5.175	55.75	35.6	37.9	29.95	104.25	62.4	55.65	37	9.5	14	7.25	4.5	10.5238	8.39801	13.0045	10.3776	48.4696	38.6787	44.6922	35.6644	47.6528	38.0269	39.6479	31.639	4.6057	3.43667	3.66432	3.04878	27.4991
138	1	37.5616	79.8	170.35	38.7	26.7	29.45	7	9.425	5.175	55.75	35.6	37.9	29.95	104.25	62.4	55.65	37	9.5	14	7.25	4.5	10.5238	8.39801	13.0045	10.3776	48.4696	38.6787	44.6908	35.6632	47.657	38.0303	39.6479	31.639	4.6057	3.43655	3.66465	3.04878	27.4991
139	1	38.7863	74.1	172	41.25	30.5	28.4	6.7	9.4	5.4	54.95	30.65	32.15	26	102.15	54.9	51.6	35.6	7.5	11.5	7.5	4.5	11.4402	8.47718	14.6076	10.8242	45.9821	34.0727	41.9944	31.1178	44.5472	33.0095	42.5573	31.5349	4.01935	2.87483	3.04959	2.91336	25.0473
140	0	39.9014	57.35	166.3	35.55	27.05	28.35	5.9	8.6	5.1	53.4	25.35	26.25	23.05	82.1	55.5	47.8	36.9	9.25	5.25	18.25	10.5	10.8678	6.23268	16.2123	9.29773	39.3987	22.5952	40.0824	22.9873	40.142	23.0214	51.0365	29.2694	3.62527	2.47235	2.47603	3.14802	20.7371
141	0	40.5753	64.95	162.3	37.2	27.25	30.3	6.5	9	4.75	54.4	29.65	30.1	25.75	87.35	55.2	45.8	35.1	26	8.25	21.25	19	11.9658	7.77177	13.5773	8.81848	33.8996	22.0178	30.3076	19.6848	31.297	20.3274	43.728	28.4013	2.83304	2.23222	2.30509	3.22066	24.6571
142	1	42.1315	73.8	177.2	41.7	30.2	27.7	6.7	9.8	5.75	55.25	32.25	34.6	27.4	97.5	57.5	50.35	37.5	5	12	8	4.5	11.5416	8.51773	16.4841	12.1653	46.8752	34.5939	46.5189	34.3309	47.9691	35.4012	43.9208	32.4136	4.0614	2.82204	2.91001	2.66443	23.5033
143	0	42.6055	70.95	158.95	37.15	26.4	30.15	7	10.2	5.6	56.4	33.2	32.25	27.3	89.8	60.6	54.3	40.85	16.75	11.5	26.75	23.75	12.345	8.75878	14.8303	10.5221	38.836	27.5541	36.2878	25.7462	38.2054	27.1067	40.2256	28.54	3.14589	2.44687	2.57618	2.71239	28.0822
144	1	44.011	73.3	185.1	41.75	30.2	29.1	7.5	10.2	6.25	59.85	28.25	30.1	26.75	91.95	54.2	50.55	35.95	6.5	8	12.75	5.25	13.5281	9.91612	19.2817	14.1335	41.9043	30.7159	41.8543	30.6792	44.7215	32.7809	45.521	33.3669	3.09757	2.17067	2.31937	2.36083	21.394
145	0	44.0685	53.2	158.6	34.75	24.65	28.65	6.3	8.75	5.3	55	26.1	27.35	22.4	87.55	53.15	46.9	33.1	16.5	6.75	19.25	8.75	12.7682	6.79266	16.9976	9.04273	40.8523	21.7334	36.8786	19.6194	39.6535	21.0957	52.3957	27.8745	3.19955	2.16963	2.33289	3.08253	21.1498
146	0	44.2712	68.6	161.95	38.65	27.35	28.15	6.5	8.5	5.1	54.9	31.6	30.55	24.1	88.8	65.5	59.15	37.45	15.75	14.75	25.25	9.5	10.8628	7.45187	12.9433	8.87909	40.6768	27.9043	38.5657	26.4561	43.5329	29.8636	42.5571	29.1942	3.7446	2.97959	3.36336	3.28797	26.1555
